# Supplementary material
Source: publisher site journal article supplement (https://www.dovepress.com/article/604452)
Supplement: Supplementary file 1 [file 604452%20Supplementary%20Material.docx]

Microenvironment-activated Fe-MOF nanoplatform enables controlled doxorubicin release and ferroptosis-associated oxidative damage in breast cancer cells

Miao Yuana,#, Yang Wua,#, Jing Zhenga,#, Chaoran Wanga, Jiarong Wanga, Yifan Zhenga, Yunqi Wanga, Baiqi Wanga,b,*

1. *Department of Occupational and Environmental Health, School of Public Health, Tianjin Medical University, Tianjin 300070, China;*
2. *National Demonstration Center for Experimental Preventive Medicine Education (Tianjin Medical University), Tianjin 300070, China;*

*# These authors contributed equally to this work.*

** Author to whom correspondence should be addressed.*

Postal Address of Dr. Baiqi Wang:

Department of Occupational and Environmental Health

School of Public Health,

Tianjin Medical University,

No. 22, Qixiangtai Rd.,

Heping Dist., Tianjin 300070,

China

Telephone number: +86-22-83336630

Fax number: +86-22-83336603

Electronic mail:[*wbqpaper@126.com*](mailto:wbqpaper@126.com)

# S1. Chemical bonding and interfacial coupling

Fourier transform infrared (FTIR) spectroscopy was employed to investigate surface chemistry and interfacial bonding in UT, UTM, and NH₂-MIL-88B(Fe) (MFe) (Fig. S1). The MFe spectrum aligns with reported NH₂-MIL-88B(Fe) frameworks, featuring bands at 1603 cm⁻¹ and 1393 cm⁻¹ (asymmetric/symmetric carboxylate stretches), 1664 cm⁻¹ (C=O vibration), 751 cm⁻¹ (aromatic/C–H out-of-plane modes), and 672 cm⁻¹ (Fe–O vibrations).


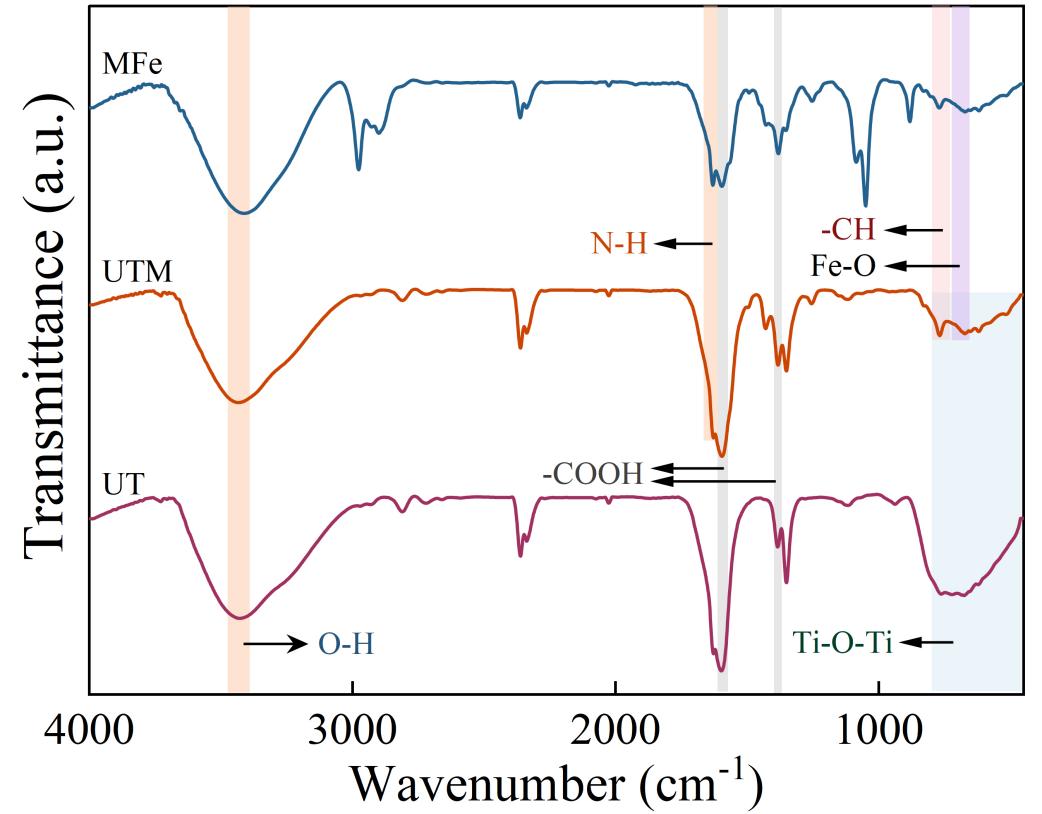


Fig. S1. FTIR spectra of UT, UTM, and NH₂-MIL-88B(Fe) (MFe). The spectra show the characteristic Ti–O–Ti vibrations of TiO₂ and the carboxylate linker bands of NH₂-MIL-88B(Fe); the reshaped low-wavenumber region in UTM suggests interfacial coupling (e.g., Ti–O–Fe linkages).

UT shows a broad peak at 3436 cm⁻¹ (O–H stretching from surface hydroxyls and adsorbed water) and strong bands at 400–880 cm⁻¹ (Ti–O–Ti lattice vibrations). UTM retains key features from both UT and MFe, confirming component integration. Reshaping and intensification of bands in the 400–800 cm⁻¹ region suggest formation of interfacial Ti–O–Fe linkages, indicating chemical bonding rather than physical mixing. This interfacial coupling enhances structural stability and supports coordinated DOX release with ferroptosis induction.

# S2. Textural properties and porosity evolution

Nitrogen adsorption–desorption measurements were performed to evaluate the evolution of textural properties from UCNP to UT and UTM 9 (Fig. S2). UCNP displayed a type II/III isotherm with negligible hysteresis, indicating a largely nonporous structure with a low specific surface area (11.96 m²/g) and a large average pore diameter (44.75 nm). After TiO₂ coating, UT exhibited a type IV isotherm with an H3 hysteresis loop, consistent with the formation of mesopores (approximately 10–20 nm) associated with the TiO₂ shell; the specific surface area increased to 12.81 m²/g and the average pore diameter decreased to 41.34 nm. Following in situ growth of NH₂-MIL-88B(Fe), UTM maintained mesoporosity but showed reduced adsorption capacity, suggesting partial pore blocking by the MOF layer. The broadened pore size distribution (approximately 5–25 nm) indicates a hierarchical porous structure that can support molecular diffusion while providing adsorption sites for drug loading and microenvironment-responsive release.


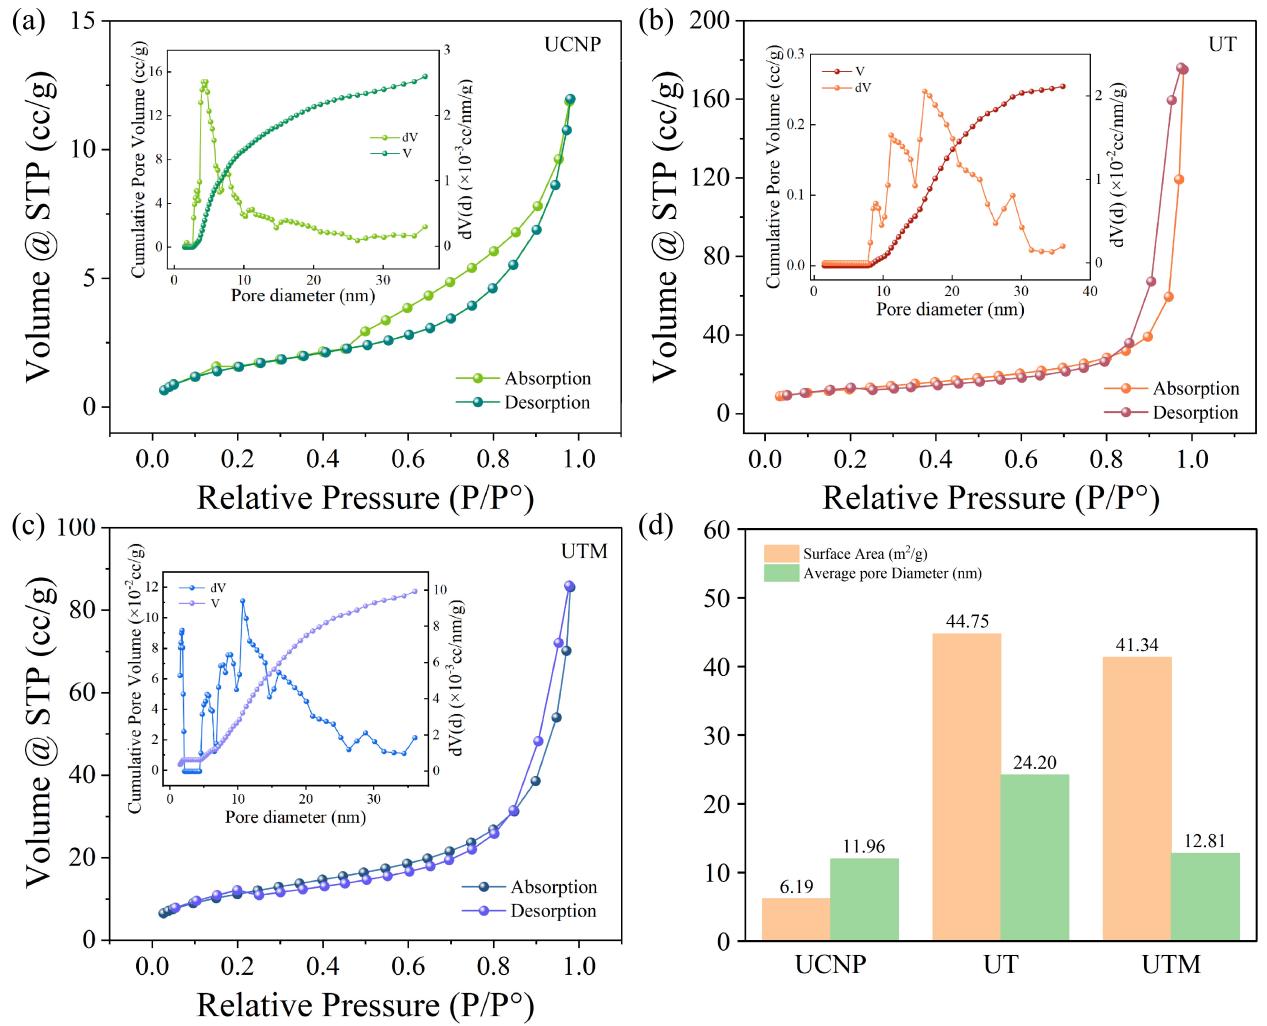


Fig. S2. Nitrogen adsorption–desorption isotherms and pore size distribution curves of (a) UCNP, (b) UT, and (c) UTM; (d) comparison of specific surface area and average pore diameter.
